# Supplementary material
Source: PubMed Central journal article supplement (PMC3082585)
Supplement: NIHMS280307-supplement-4_si_004.pdf [file NIHMS280307-supplement-4_si_004.pdf]

Table S3. List of the outliers.

| Name                                                              | $\Delta E_{QM}$ | AL              |      | AE              |      | AT              |      | F94             |       | F03             |       |
|-------------------------------------------------------------------|-----------------|-----------------|------|-----------------|------|-----------------|------|-----------------|-------|-----------------|-------|
|                                                                   |                 | $\Delta E_{MM}$ | RES   | $\Delta E_{MM}$ | RES   |
| <b><math>\pi</math>-<math>\pi</math> Interaction (13 pairs)</b>   |                 |                 |      |                 |      |                 |      |                 |       |                 |       |
| trp_trp_4                                                         | -13.48          | -9.24           | 4.24 | -9.24           | 4.24 | -9.25           | 4.23 | -7.79           | 5.69  | -8.56           | 4.92  |
| tyr_tyr_3                                                         | -7.66           | -4.26           | 3.41 | -4.21           | 3.45 | -4.25           | 3.41 | -3.59           | 4.07  | -3.60           | 4.06  |
| tyr_trp_2                                                         | -8.57           | -5.23           | 3.34 | -5.19           | 3.38 | -5.23           | 3.34 | -4.67           | 3.90  | -4.71           | 3.86  |
| tyr_tyr_5                                                         | -10.01          | -6.68           | 3.33 | -6.60           | 3.41 | -6.68           | 3.33 | -6.24           | 3.77  | -6.39           | 3.62  |
| phe_tyr_7                                                         | -8.13           | -4.92           | 3.20 | -4.90           | 3.23 | -4.93           | 3.20 | -4.43           | 3.70  | -4.54           | 3.59  |
| phe_trp_5                                                         | -10.58          | -7.48           | 3.11 | -7.50           | 3.08 | -7.49           | 3.09 | -6.46           | 4.12  | -6.95           | 3.63  |
| phe_trp_6                                                         | -10.48          | -7.38           | 3.10 | -7.40           | 3.08 | -7.39           | 3.09 | -6.35           | 4.13  | -6.84           | 3.63  |
| phe_trp_1                                                         | -7.60           | -4.56           | 3.05 | -4.56           | 3.05 | -4.56           | 3.04 | -4.16           | 3.45  | -4.29           | 3.32  |
| tyr_tyr_6                                                         | -9.65           | -6.81           | 2.85 | -6.79           | 2.86 | -6.81           | 2.84 | -6.61           | 3.04  | -6.70           | 2.95  |
| phe_phe_4                                                         | -6.96           | -4.13           | 2.83 | -4.09           | 2.87 | -4.13           | 2.83 | -3.56           | 3.40  | -3.73           | 3.23  |
| tyr_trp_4                                                         | -8.19           | -5.61           | 2.59 | -5.57           | 2.62 | -5.60           | 2.59 | -5.00           | 3.20  | -4.93           | 3.26  |
| phe_trp_2                                                         | -9.63           | -7.05           | 2.58 | -7.09           | 2.54 | -7.06           | 2.57 | -6.30           | 3.33  | -6.74           | 2.89  |
| phe_trp_4                                                         | -6.27           | -3.72           | 2.55 | -3.72           | 2.55 | -3.73           | 2.54 | -3.67           | 2.60  | -3.59           | 2.68  |
| <b>H-Bonding (4 pairs)</b>                                        |                 |                 |      |                 |      |                 |      |                 |       |                 |       |
| thr_asp_2                                                         | -19.55          | -22.93          | 3.38 | -22.66          | 3.11 | -23.58          | 4.03 | -17.37          | 2.19  | -17.59          | 1.96  |
| thr_asp_1                                                         | -19.55          | -22.93          | 3.38 | -22.65          | 3.10 | -23.57          | 4.02 | -17.36          | 2.18  | -17.59          | 1.96  |
| ser_glu_1                                                         | -19.36          | -21.62          | 2.26 | -21.93          | 2.56 | -22.82          | 3.46 | -17.08          | 2.28  | -17.75          | 1.61  |
| ser_glu_2                                                         | -19.37          | -21.62          | 2.26 | -21.93          | 2.56 | -22.82          | 3.46 | -17.08          | 2.28  | -17.76          | 1.61  |
| <b><math>n</math>-<math>\sigma^*</math> Interaction (9 pairs)</b> |                 |                 |      |                 |      |                 |      |                 |       |                 |       |
| glu_phe_1                                                         | -7.21           | -2.22           | 4.99 | -1.45           | 5.76 | -2.11           | 5.10 | 2.08            | 9.29  | 2.47            | 9.68  |
| glu_phe_5                                                         | -7.46           | -2.95           | 4.52 | -2.23           | 5.23 | -2.85           | 4.62 | 1.08            | 8.54  | 1.47            | 8.94  |
| asp_tyr_4                                                         | -10.15          | -6.57           | 3.59 | -6.11           | 4.04 | -6.51           | 3.65 | 0.09            | 10.24 | 1.02            | 11.17 |
| asp_tyr_1                                                         | -11.25          | -7.87           | 3.38 | -7.59           | 3.66 | -7.84           | 3.41 | -0.83           | 10.42 | 0.13            | 11.38 |
| asp_tyr_6                                                         | -11.25          | -7.91           | 3.34 | -7.63           | 3.63 | -7.87           | 3.38 | -0.87           | 10.39 | 0.09            | 11.34 |
| glu_tyr_6                                                         | -11.11          | -7.93           | 3.18 | -7.62           | 3.49 | -7.90           | 3.21 | -0.91           | 10.20 | 0.01            | 11.12 |
| glu_tyr_3                                                         | -11.11          | -7.94           | 3.17 | -7.62           | 3.49 | -7.90           | 3.21 | -0.92           | 10.20 | 0.00            | 11.12 |
| asp_trp_3                                                         | -9.92           | -7.17           | 2.76 | -6.86           | 3.06 | -7.15           | 2.77 | 0.95            | 10.87 | 2.47            | 12.40 |
| asp_phe_1                                                         | -11.31          | -8.61           | 2.70 | -8.41           | 2.90 | -8.60           | 2.71 | -1.37           | 9.94  | -1.40           | 9.91  |
| <b>Cation-<math>\pi</math> Interaction (13 pairs)</b>             |                 |                 |      |                 |      |                 |      |                 |       |                 |       |
| lys_phe_2                                                         | -19.33          | -23.25          | 3.92 | -22.74          | 3.40 | -23.20          | 3.87 | -13.32          | 6.02  | -13.03          | 6.31  |
| lys_phe_1                                                         | -20.12          | -23.75          | 3.63 | -23.12          | 3.00 | -23.70          | 3.58 | -13.51          | 6.61  | -13.18          | 6.94  |
| lys_phe_3                                                         | -20.16          | -23.79          | 3.62 | -23.15          | 2.98 | -23.71          | 3.55 | -13.66          | 6.50  | -13.37          | 6.80  |
| lys_phe_4                                                         | -19.65          | -23.15          | 3.50 | -22.51          | 2.86 | -23.11          | 3.46 | -12.69          | 6.96  | -12.34          | 7.31  |
| lys_phe_6                                                         | -19.65          | -23.15          | 3.50 | -22.52          | 2.86 | -23.11          | 3.46 | -12.71          | 6.94  | -12.35          | 7.30  |
| lys_phe_5                                                         | -19.78          | -23.04          | 3.26 | -22.41          | 2.64 | -22.99          | 3.21 | -12.85          | 6.93  | -12.50          | 7.28  |
| lys_trp_4                                                         | -25.81          | -28.81          | 3.01 | -28.33          | 2.52 | -28.76          | 2.96 | -17.54          | 8.27  | -18.20          | 7.60  |
| lys_trp_6                                                         | -27.10          | -30.10          | 3.00 | -29.45          | 2.35 | -30.03          | 2.93 | -18.97          | 8.14  | -19.34          | 7.76  |
| lys_trp_3                                                         | -27.09          | -30.07          | 2.97 | -29.41          | 2.32 | -29.99          | 2.89 | -18.97          | 8.12  | -19.35          | 7.74  |
| lys_trp_5                                                         | -26.48          | -29.30          | 2.82 | -28.72          | 2.24 | -29.23          | 2.75 | -18.59          | 7.89  | -18.88          | 7.60  |
| lys_trp_1                                                         | -23.29          | -25.95          | 2.66 | -25.21          | 1.92 | -25.93          | 2.64 | -16.87          | 6.42  | -14.96          | 8.33  |
| lys_trp_2                                                         | -23.22          | -25.84          | 2.62 | -25.11          | 1.89 | -25.83          | 2.61 | -16.70          | 6.51  | -14.79          | 8.43  |
| arg_phe_3                                                         | -16.30          | -18.84          | 2.53 | -18.56          | 2.25 | -18.83          | 2.53 | -12.64          | 3.67  | -12.19          | 4.11  |
| <b>Sulfur-containing analog-analog pairs (5 pairs)</b>            |                 |                 |      |                 |      |                 |      |                 |       |                 |       |

|           |       |       |      |       |      |       |      |       |      |       |      |
|-----------|-------|-------|------|-------|------|-------|------|-------|------|-------|------|
| cys_trp_2 | -6.37 | -3.44 | 2.92 | -3.45 | 2.91 | -3.45 | 2.92 | -3.54 | 2.83 | -3.74 | 2.62 |
| met_tyr_2 | -8.55 | -5.69 | 2.86 | -5.60 | 2.95 | -5.71 | 2.84 | -5.26 | 3.29 | -5.76 | 2.79 |
| met_tyr_3 | -8.14 | -5.46 | 2.69 | -5.39 | 2.75 | -5.48 | 2.67 | -5.16 | 2.98 | -5.63 | 2.51 |
| met_tyr_5 | -8.06 | -5.44 | 2.62 | -5.34 | 2.72 | -5.44 | 2.62 | -4.96 | 3.10 | -5.48 | 2.58 |
| cys_trp_1 | -5.61 | -3.07 | 2.54 | -3.04 | 2.57 | -3.07 | 2.54 | -2.75 | 2.86 | -2.53 | 3.08 |

The outliers were identified when the energy differences between QM and MM are greater than 2.5 kcal/mol using the MM energies of AT.  $\Delta E_{MM}$ : interaction energies by MM model. All energies are in kcal/mol.

Table S6. The predicted (PRED) interaction energies and the residuals (RES) of the amino acids dimer outliers<sup>a</sup> for three Set A models (AL, AE and AT) and two non-polarizable models (F1 and F2) using the new van der Waals parameters<sup>b</sup>. All energies are in kcal/mol.

| Name                                                 | QM     | AL     |      | AE     |      | AT     |      | FF94   |       | FF03   |       |
|------------------------------------------------------|--------|--------|------|--------|------|--------|------|--------|-------|--------|-------|
|                                                      |        | PRED.  | RES  | PRED   | RES  | PRED   | RES  | PRED   | RES   | PRED   | RES   |
| <b><math>\pi</math>-<math>\pi</math> Interaction</b> |        |        |      |        |      |        |      |        |       |        |       |
| trp_trp_4                                            | -13.48 | -10.75 | 2.73 | -10.75 | 2.73 | -10.76 | 2.72 | -9.30  | 4.18  | -10.07 | 3.41  |
| tyr_tyr_3                                            | -7.66  | -7.59  | 0.07 | -7.55  | 0.11 | -7.59  | 0.07 | -6.93  | 0.73  | -6.94  | 0.72  |
| tyr_trp_2                                            | -8.57  | -7.24  | 1.33 | -7.20  | 1.37 | -7.23  | 1.33 | -6.68  | 1.89  | -6.72  | 1.85  |
| tyr_tyr_5                                            | -10.01 | -9.49  | 0.52 | -9.41  | 0.60 | -9.49  | 0.52 | -9.05  | 0.96  | -9.20  | 0.81  |
| phe_tyr_7                                            | -8.13  | -8.08  | 0.05 | -8.06  | 0.07 | -8.08  | 0.04 | -7.58  | 0.54  | -7.70  | 0.43  |
| phe_trp_5                                            | -10.58 | -9.45  | 1.14 | -9.47  | 1.11 | -9.46  | 1.12 | -8.43  | 2.15  | -8.92  | 1.66  |
| phe_trp_6                                            | -10.48 | -9.36  | 1.12 | -9.38  | 1.09 | -9.37  | 1.10 | -8.33  | 2.14  | -8.83  | 1.65  |
| phe_trp_1                                            | -7.60  | -6.41  | 1.20 | -6.41  | 1.19 | -6.41  | 1.19 | -6.01  | 1.59  | -6.14  | 1.46  |
| tyr_tyr_6                                            | -9.65  | -9.88  | 0.22 | -9.86  | 0.21 | -9.88  | 0.23 | -9.68  | 0.03  | -9.77  | 0.12  |
| phe_phe_4                                            | -6.96  | -7.32  | 0.37 | -7.28  | 0.33 | -7.32  | 0.37 | -6.75  | 0.21  | -6.92  | 0.03  |
| tyr_trp_4                                            | -8.19  | -7.95  | 0.24 | -7.92  | 0.28 | -7.95  | 0.25 | -7.34  | 0.85  | -7.28  | 0.92  |
| phe_trp_2                                            | -9.63  | -8.87  | 0.76 | -8.92  | 0.71 | -8.88  | 0.75 | -8.13  | 1.50  | -8.57  | 1.06  |
| phe_trp_4                                            | -6.27  | -5.28  | 0.99 | -5.28  | 0.98 | -5.29  | 0.98 | -5.23  | 1.03  | -5.15  | 1.12  |
| <b>H-Bonding</b>                                     |        |        |      |        |      |        |      |        |       |        |       |
| thr_asp_2                                            | -19.55 | -22.99 | 3.44 | -22.72 | 3.17 | -23.64 | 4.09 | -17.43 | 2.12  | -17.65 | 1.90  |
| thr_asp_1                                            | -19.55 | -22.99 | 3.44 | -22.71 | 3.16 | -23.63 | 4.08 | -17.43 | 2.12  | -17.65 | 1.90  |
| ser_glu_1                                            | -19.36 | -21.55 | 2.19 | -21.86 | 2.49 | -22.75 | 3.39 | -17.01 | 2.35  | -17.68 | 1.68  |
| ser_glu_2                                            | -19.37 | -21.55 | 2.19 | -21.86 | 2.49 | -22.75 | 3.39 | -17.01 | 2.35  | -17.68 | 1.68  |
| <b>n-<math>\sigma</math>* Interaction</b>            |        |        |      |        |      |        |      |        |       |        |       |
| glu_phe_1                                            | -7.21  | -2.51  | 4.70 | -1.74  | 5.47 | -2.40  | 4.81 | 1.79   | 9.00  | 2.18   | 9.39  |
| glu_phe_5                                            | -7.46  | -3.35  | 4.11 | -2.63  | 4.83 | -3.25  | 4.21 | 0.67   | 8.13  | 1.07   | 8.53  |
| asp_tyr_4                                            | -10.15 | -6.80  | 3.35 | -6.35  | 3.81 | -6.74  | 3.41 | -0.14  | 10.01 | 0.79   | 10.94 |
| asp_tyr_1                                            | -11.25 | -8.24  | 3.01 | -7.96  | 3.29 | -8.21  | 3.04 | -1.20  | 10.05 | -0.25  | 11.01 |
| asp_tyr_6                                            | -11.25 | -8.28  | 2.97 | -8.00  | 3.25 | -8.24  | 3.01 | -1.24  | 10.01 | -0.29  | 10.97 |
| glu_tyr_6                                            | -11.11 | -8.31  | 2.80 | -8.00  | 3.11 | -8.29  | 2.82 | -1.29  | 9.82  | -0.37  | 10.74 |
| glu_tyr_3                                            | -11.11 | -8.33  | 2.79 | -8.01  | 3.11 | -8.29  | 2.82 | -1.30  | 9.81  | -0.38  | 10.73 |
| asp_trp_3                                            | -9.92  | -7.38  | 2.54 | -7.08  | 2.84 | -7.37  | 2.56 | 0.73   | 10.65 | 2.26   | 12.18 |
| asp_phe_1                                            | -11.31 | -8.97  | 2.33 | -8.77  | 2.54 | -8.96  | 2.34 | -1.73  | 9.57  | -1.76  | 9.55  |
| <b>Cation-<math>\pi</math> Interaction</b>           |        |        |      |        |      |        |      |        |       |        |       |
| lys_phe_2                                            | -19.33 | -23.72 | 4.39 | -23.21 | 3.87 | -23.67 | 4.34 | -13.79 | 5.54  | -13.50 | 5.83  |
| lys_phe_1                                            | -20.12 | -24.26 | 4.15 | -23.63 | 3.51 | -24.21 | 4.09 | -14.02 | 6.10  | -13.69 | 6.43  |
| lys_phe_3                                            | -20.16 | -24.29 | 4.13 | -23.65 | 3.49 | -24.22 | 4.05 | -14.17 | 6.00  | -13.87 | 6.29  |
| lys_phe_4                                            | -19.65 | -23.59 | 3.94 | -22.95 | 3.30 | -23.55 | 3.90 | -13.14 | 6.51  | -12.79 | 6.86  |
| lys_phe_6                                            | -19.65 | -23.59 | 3.94 | -22.96 | 3.31 | -23.55 | 3.90 | -13.15 | 6.50  | -12.80 | 6.85  |
| lys_phe_5                                            | -19.78 | -23.54 | 3.76 | -22.92 | 3.14 | -23.50 | 3.72 | -13.35 | 6.42  | -13.01 | 6.77  |
| lys_trp_4                                            | -25.81 | -28.92 | 3.11 | -28.43 | 2.62 | -28.87 | 3.06 | -17.64 | 8.16  | -18.31 | 7.50  |
| lys_trp_6                                            | -27.10 | -30.29 | 3.19 | -29.63 | 2.53 | -30.21 | 3.11 | -19.15 | 7.95  | -19.53 | 7.57  |
| lys_trp_3                                            | -27.09 | -30.26 | 3.17 | -29.60 | 2.51 | -30.18 | 3.09 | -19.16 | 7.93  | -19.54 | 7.55  |
| lys_trp_5                                            | -26.48 | -29.45 | 2.97 | -28.87 | 2.39 | -29.38 | 2.90 | -18.74 | 7.74  | -19.03 | 7.45  |
| lys_trp_1                                            | -23.29 | -26.57 | 3.28 | -25.83 | 2.54 | -26.55 | 3.26 | -17.49 | 5.80  | -15.58 | 7.71  |
| lys_trp_2                                            | -23.22 | -26.42 | 3.20 | -25.69 | 2.47 | -26.41 | 3.20 | -17.28 | 5.93  | -15.37 | 7.85  |

|                                             |        |        |      |        |      |        |      |        |      |        |      |
|---------------------------------------------|--------|--------|------|--------|------|--------|------|--------|------|--------|------|
| arg_phe_3                                   | -16.30 | -20.20 | 3.90 | -19.92 | 3.62 | -20.20 | 3.89 | -14.00 | 2.30 | -13.56 | 2.75 |
| <b>Sulfur-contained analog-analog pairs</b> |        |        |      |        |      |        |      |        |      |        |      |
| cys_trp_2                                   | -6.37  | -3.76  | 2.61 | -3.76  | 2.60 | -3.76  | 2.61 | -3.85  | 2.52 | -4.06  | 2.31 |
| met_tyr_2                                   | -8.55  | -6.46  | 2.09 | -6.37  | 2.18 | -6.48  | 2.07 | -6.03  | 2.52 | -6.53  | 2.02 |
| met_tyr_3                                   | -8.14  | -6.17  | 1.98 | -6.11  | 2.04 | -6.19  | 1.95 | -5.87  | 2.27 | -6.34  | 1.80 |
| met_tyr_5                                   | -8.06  | -6.23  | 1.82 | -6.14  | 1.92 | -6.24  | 1.82 | -5.76  | 2.30 | -6.27  | 1.79 |
| cys_trp_1                                   | -5.61  | -3.43  | 2.18 | -3.40  | 2.21 | -3.43  | 2.18 | -3.11  | 2.50 | -2.89  | 2.72 |

<sup>a</sup>The outliers were identified when the energy differences between QM and MM (predicted by Model AT) are large than 2.5 kcal/mol.

<sup>b</sup> The following new van der Waals parameter were applied in MM calculations: HO (the hydroxyl hydrogen) changed from ( $r_0 = 0$  and  $\epsilon = 0$ ) to ( $r_0 = 0.25$  and  $\epsilon = 0.028$ ), H (amine or amide hydrogen) changed from ( $r_0 = 0.6$  and  $\epsilon = 0.0157$ ) to ( $r_0 = 0.65$  and  $\epsilon = 0.0055$ ), and CA (aromatic carbon) changed from ( $r_0 = 1.908$  and  $\epsilon = 0.086$ ) to ( $r_0 = 1.908$  and  $\epsilon = 0.180$ ).
